# Supplementary material for: Identification of KIF4A and its effect on the progression of lung adenocarcinoma based on the bioinformatics analysis
Source: Oxford University Press journal article supplement (doi:10.1042/bsr20203973), 2021-01-01
Supplement: bsr-2020-3973_supp.pdf [file bsr-2020-3973_supp.pdf]

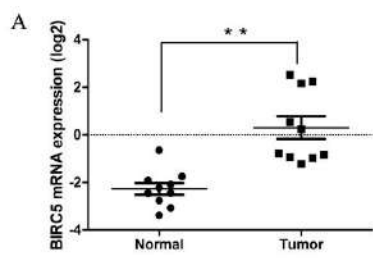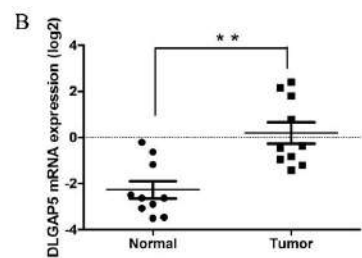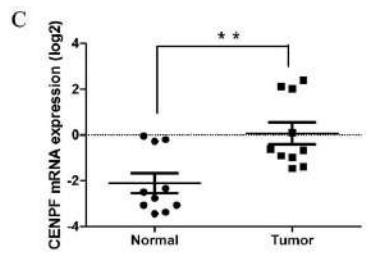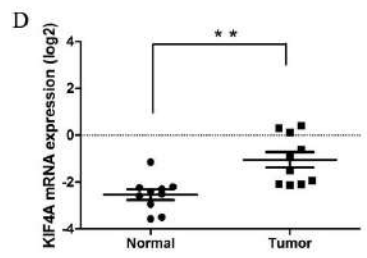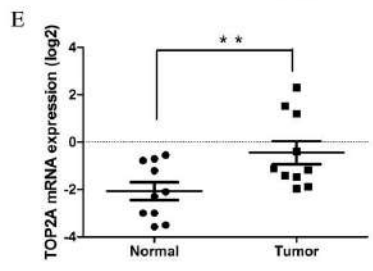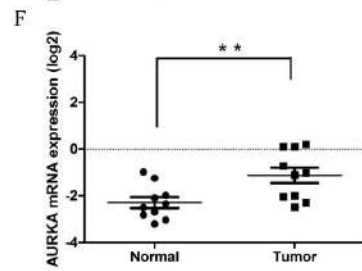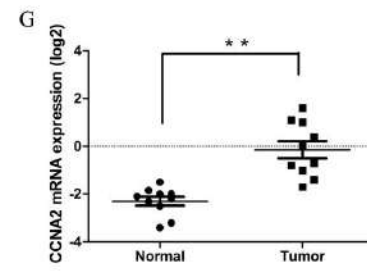

**Supplementary Figure 1.** Validation of the mRNA expression of the seven hub genes comparing paired normal samples (n=10) and LUAD samples (n=10) by PCR analysis. (A) BIRC5, (B) DLGAP5, (C) CENPF, (D) KIF4A, (E) TOP2A, (F) AURKA, and (G) CCNA2. All of the data are presented as means  $\pm$  SD. \*\*, *P-value*<0.01.

**Supplementary Table 1.** The detailed information of the three GEO datasets.

| <b>Dataset</b> | <b>Numbers of samples (Tumor / Normal)</b> | <b>Histological types</b> | <b>Experiment type</b> | <b>Origin</b> |
|----------------|--------------------------------------------|---------------------------|------------------------|---------------|
| GSE85716       | 12/12                                      | Adenocarcinoma            | mRNA                   | Sci Rep       |
| GSE32863       | 58/58                                      | Adenocarcinoma            | mRNA                   | Genome Res    |
| GSE116959      | 57/11                                      | Adenocarcinoma            | mRNA                   | Oncogene      |

Note: GEO, Gene Expression Omnibus

**Supplementary Table 2.** The primer sequences of the hub genes.

|        |                                        |
|--------|----------------------------------------|
| BIRC5  | forward, 5'-ATTCGTCCGGTTGCGCTTCC-3'    |
|        | reverse, 5'-CACGGCGCACTTCTTCGCAG-3'    |
| DLGAP5 | forward, 5'-AAGTGGGTCGTTATAGACCTGA-3'  |
|        | reverse 5'-TGCTCGAACATCACTCTCGTTAT-3'  |
| CENPF  | forward, 5'-AAAGAAACAGACGGAACAACCTG-3' |
|        | reverse 5'-CCAAGCAAAGACCGAGAACT-3'     |
| KIF4A  | forward, 5'-TACTGCGGTGGAGCAAGAAG-3'    |
|        | reverse 5'-CATCTGCGCTTGACGGAGAG3'      |
| TOP2A  | forward, 5'-CTAGTTAATGCTGCGGACAACA-3'  |
|        | reverse 5'-CATTTCGACCACCTGTCACTT-3'    |
| AURKA  | forward, 5'-AGTTGGAGGTCCAAAACGTG-3'    |
|        | reverse 5'-TCCAAGTGGTGCATATTCCA-3'     |
| CCNA2  | forward, 5'-CACTCTACACAGTCAGGGGA-3'    |
|        | reverse 5'-AGTGTCTCTGGTGGGTTGAG-3'     |
| GADPH  | forward 5'-CATCTCTGCCCCCTCTGCTGA-3'    |
|        | reverse 5'-GGATGACCTTGCCCACAGCCT-3'    |

**Supplementary Table 3.** The information of the upregulated DEGs between adjacent normal lung and LUAD tissues

| <b>Gene</b>  | <b>logFC</b> | <b>AveExpr</b> | <b>t</b> | <b>P.Value</b> | <b>adj.P.Val</b> | <b>B</b> |
|--------------|--------------|----------------|----------|----------------|------------------|----------|
| XAGE1A       | 2.818124     | 7.024731       | 3.59438  | 0.003301       | 0.035687         | -2.03285 |
| SPP1         | 3.67501      | 8.270667       | 6.117881 | 3.79E-05       | 0.002047         | 2.440225 |
| TUBB3        | 2.527322     | 4.812491       | 3.673739 | 0.002838       | 0.032767         | -1.88325 |
| TMPRSS4      | 2.936224     | 7.172396       | 3.906683 | 0.001826       | 0.02494          | -1.44526 |
| PHLDA2       | 2.070969     | 6.68861        | 4.797153 | 0.000355       | 0.009232         | 0.191714 |
| MMP11        | 2.36827      | 8.729277       | 13.11481 | 2.51E-07       | 0.000204         | 7.533217 |
| TOP2A        | 3.364929     | 5.70608        | 4.614423 | 0.000494       | 0.01121          | -0.13769 |
| CYP24A1      | 1.814183     | 3.943949       | 3.853667 | 0.002018       | 0.026237         | -1.54473 |
| XDH          | 2.270497     | 4.378626       | 3.70179  | 0.002691       | 0.031642         | -1.8304  |
| CP           | 3.270281     | 6.584131       | 3.323473 | 0.005542       | 0.048053         | -2.54374 |
| SGPP2        | 3.104349     | 6.703745       | 6.3222   | 2.74E-05       | 0.001634         | 2.765672 |
| PLEK2        | 2.177398     | 4.160249       | 4.978233 | 0.000258       | 0.007444         | 0.514129 |
| CEP55        | 1.549506     | 4.897171       | 3.863248 | 0.001982       | 0.026053         | -1.52675 |
| ABCC3        | 2.004989     | 8.640878       | 5.08149  | 0.000215       | 0.006641         | 0.696099 |
| GJB2         | 1.599979     | 3.840176       | 3.643585 | 0.003006       | 0.034034         | -1.94008 |
| MNX1         | 2.994084     | 3.579718       | 3.925726 | 0.001762       | 0.024347         | -1.40956 |
| COL1A1       | 1.690818     | 7.455179       | 3.372773 | 0.005042       | 0.045648         | -2.45084 |
| HS6ST2       | 1.688701     | 4.689706       | 4.838842 | 0.00033        | 0.008818         | 0.266306 |
| UBE2T        | 2.967068     | 5.103812       | 5.459279 | 0.000112       | 0.004273         | 1.349591 |
| FUT3         | 2.043435     | 5.736336       | 5.475034 | 0.000109       | 0.004223         | 1.376411 |
| STX1A        | 2.935411     | 5.067663       | 7.254678 | 6.67E-06       | 0.000628         | 4.173654 |
| HIST1H2AI    | 2.880545     | 5.306701       | 4.208568 | 0.001038       | 0.01774          | -0.88221 |
| CXCL13       | 2.870715     | 4.146376       | 4.44511  | 0.000672       | 0.013532         | -0.44627 |
| GPT2         | 2.783919     | 4.724283       | 8.466538 | 1.26E-06       | 0.000211         | 5.822701 |
| FAM83A       | 2.707739     | 5.976604       | 6.542513 | 1.94E-05       | 0.001292         | 3.109719 |
| LOC100130811 | 2.680684     | 7.72016        | 4.785064 | 0.000363       | 0.009328         | 0.170044 |
| HIST2H3A     | 2.61482      | 8.421248       | 3.836221 | 0.002086       | 0.02676          | -1.5775  |
| DLGAP5       | 2.58805      | 3.474919       | 4.088373 | 0.001299       | 0.02047          | -1.10561 |
| CBLC         | 2.585204     | 3.886146       | 4.999561 | 0.000248       | 0.007272         | 0.55183  |
| GINS2        | 2.533287     | 5.133182       | 3.601494 | 0.003256       | 0.035532         | -2.01944 |
| MEX3A        | 2.527057     | 3.452469       | 4.490277 | 0.000618       | 0.012874         | -0.36365 |
| MMP1         | 2.510838     | 5.588877       | 3.448129 | 0.004365       | 0.041578         | -2.30874 |
| PYCR1        | 2.406433     | 6.333929       | 7.417624 | 5.28E-06       | 0.000547         | 4.406941 |
| STK32A       | 2.333879     | 6.39677        | 5.765152 | 6.72E-05       | 0.003005         | 1.863954 |
| HMGB3        | 2.330866     | 6.033155       | 5.581962 | 9.12E-05       | 0.003715         | 1.557512 |
| GOLM1        | 2.317666     | 8.311508       | 7.010564 | 9.55E-06       | 0.000807         | 3.817162 |
| BIRC5        | 2.294236     | 5.50253        | 3.487856 | 0.004045       | 0.039984         | -2.2338  |
| MELK         | 2.269227     | 4.768067       | 3.718442 | 0.002607       | 0.030877         | -1.79904 |
| SFN          | 2.266313     | 9.028779       | 5.394662 | 0.000125       | 0.00461          | 1.239219 |
| CENPF        | 2.264698     | 5.174452       | 3.969908 | 0.001621       | 0.023304         | -1.32683 |
| PODXL2       | 2.259731     | 5.790414       | 9.528018 | 3.33E-07       | 0.000104         | 7.114909 |

|            |          |          |          |          |          |          |
|------------|----------|----------|----------|----------|----------|----------|
| NEK2       | 2.215783 | 3.851914 | 3.383537 | 0.004939 | 0.044964 | -2.43055 |
| AURKA      | 2.178471 | 6.812019 | 5.083053 | 0.000215 | 0.006635 | 0.698841 |
| KIF4A      | 2.160272 | 5.144072 | 3.417562 | 0.004627 | 0.04325  | -2.36639 |
| LOC283710  | 2.151973 | 3.818108 | 5.34134  | 0.000137 | 0.004939 | 1.1477   |
| EXO1       | 2.125513 | 4.785475 | 3.954176 | 0.00167  | 0.023572 | -1.35628 |
| HIST1H2AM  | 2.091739 | 6.882594 | 3.705284 | 0.002673 | 0.031522 | -1.82382 |
| MLF1IP     | 2.088122 | 4.340229 | 4.529615 | 0.000576 | 0.012375 | -0.29187 |
| GALNT7     | 2.084426 | 5.156065 | 6.720718 | 1.48E-05 | 0.001086 | 3.382813 |
| HIST1H3B   | 2.082695 | 10.38385 | 3.40007  | 0.004785 | 0.044222 | -2.39938 |
| CCNA2      | 2.058195 | 6.612935 | 3.869014 | 0.00196  | 0.0259   | -1.51592 |
| GTSE1      | 2.027084 | 4.658961 | 3.294916 | 0.005853 | 0.049899 | -2.59752 |
| IL2RA      | 2.02583  | 5.918288 | 4.039577 | 0.001423 | 0.021402 | -1.19661 |
| SGOL1      | 2.021829 | 3.800428 | 3.638276 | 0.003036 | 0.034211 | -1.95009 |
| SLC22A18AS | 2.00686  | 4.493097 | 3.537846 | 0.003677 | 0.038006 | -2.13949 |
| MCM4       | 2.001465 | 7.018757 | 5.442296 | 0.000116 | 0.004328 | 1.32064  |

---

**Supplementary Table 4.** The information of the downregulated DEGs between adjacent normal lung and LUAD tissues

| <b>Gene</b> | <b>logFC</b> | <b>AveExpr</b> | <b>t</b> | <b>P.Value</b> | <b>adj.P.Val</b> | <b>B</b> |
|-------------|--------------|----------------|----------|----------------|------------------|----------|
| CLDN18      | -3.88033     | 10.80772       | -6.77385 | 3.46E-09       | 2.33E-07         | 10.76398 |
| ITLN2       | -3.51928     | 8.32816        | -10.0317 | 4.25E-15       | 2.62E-12         | 24.02374 |
| TMEM100     | -3.35949     | 7.811716       | -13.8606 | 1.37E-21       | 7.33E-18         | 38.49646 |
| AGER        | -3.09523     | 9.528863       | -9.46257 | 4.47E-14       | 1.65E-11         | 21.73303 |
| FMO2        | -2.80928     | 9.846211       | -10.3868 | 9.93E-16       | 7.41E-13         | 25.43872 |
| FIGF        | -2.70543     | 8.339863       | -8.58609 | 1.74E-12       | 3.60E-10         | 18.1637  |
| GDF10       | -3.69388     | 8.413394       | -9.57906 | 2.76E-14       | 1.16E-11         | 22.20396 |
| ADAMTS8     | -2.57774     | 8.193042       | -8.38423 | 4.06E-12       | 7.24E-10         | 17.33719 |
| C2orf40     | -3.32916     | 8.144675       | -7.6599  | 8.53E-11       | 9.85E-09         | 14.36906 |
| GKN2        | -2.58148     | 8.152254       | -6.03009 | 7.30E-08       | 3.10E-06         | 7.80171  |
| CLEC3B      | -2.56803     | 12.07937       | -8.41236 | 3.61E-12       | 6.58E-10         | 17.45243 |
| FAM107A     | -2.55681     | 8.368239       | -8.62986 | 1.45E-12       | 3.02E-10         | 18.34278 |
| CAV1        | -2.55138     | 10.62217       | -9.49008 | 3.99E-14       | 1.50E-11         | 21.84431 |
| PI16        | -2.23703     | 7.731624       | -8.79103 | 7.37E-13       | 1.67E-10         | 19.00156 |
| ADH1C       | -2.46707     | 10.04903       | -6.13795 | 4.71E-08       | 2.16E-06         | 8.225839 |
| CA4         | -3.45929     | 7.226869       | -13.2789 | 1.18E-20       | 4.25E-17         | 36.42023 |
| TNNC1       | -2.41189     | 9.342043       | -7.93431 | 2.69E-11       | 3.71E-09         | 15.49313 |
| HBD         | -2.38861     | 12.49211       | -6.20956 | 3.52E-08       | 1.69E-06         | 8.508619 |
| ADH1A       | -2.03745     | 8.210561       | -7.64582 | 9.05E-11       | 1.03E-08         | 14.31145 |
| MYOC        | -2.32466     | 6.28135        | -12.5705 | 1.74E-19       | 3.48E-16         | 33.82893 |
| C10orf116   | -3.27965     | 12.82333       | -7.48733 | 1.76E-10       | 1.76E-08         | 13.66327 |
| MFAP4       | -3.26452     | 12.49525       | -7.38161 | 2.74E-10       | 2.54E-08         | 13.23151 |
| SLC6A4      | -3.25955     | 6.467535       | -13.5003 | 5.19E-21       | 2.38E-17         | 37.21581 |
| HBA2        | -3.15205     | 12.25895       | -6.23993 | 3.11E-08       | 1.51E-06         | 8.628815 |
| MGAT3       | -3.12558     | 8.290119       | -8.5317  | 2.19E-12       | 4.30E-10         | 17.94111 |
| SEMA5A      | -3.10479     | 9.905222       | -8.71726 | 1.00E-12       | 2.12E-10         | 18.70017 |
| SFTPC       | -3.09917     | 15.7502        | -3.37863 | 0.001203       | 0.009561         | -1.48333 |
| VIPR1       | -2.99041     | 7.810181       | -10.4062 | 9.18E-16       | 7.01E-13         | 25.51536 |
| DNASE1L3    | -2.98458     | 7.885619       | -8.05608 | 1.61E-11       | 2.36E-09         | 15.99227 |
| TEK         | -2.91956     | 9.15555        | -8.39065 | 3.96E-12       | 7.13E-10         | 17.36351 |
| AOC3        | -2.91684     | 10.50087       | -8.86689 | 5.36E-13       | 1.27E-10         | 19.31132 |
| SLC39A8     | -2.91019     | 9.620007       | -9.96957 | 5.49E-15       | 3.00E-12         | 23.77495 |
| OGN         | -2.89869     | 6.90445        | -9.2366  | 1.14E-13       | 3.50E-11         | 20.81681 |
| SCN4B       | -2.8927      | 7.849193       | -9.74378 | 1.39E-14       | 6.77E-12         | 22.86814 |
| FXYD1       | -2.89169     | 7.51509        | -10.3037 | 1.39E-15       | 9.73E-13         | 25.10874 |
| CHRM1       | -2.8862      | 6.025893       | -13.2775 | 1.19E-20       | 4.25E-17         | 36.4151  |
| RTKN2       | -2.8333      | 7.255558       | -13.2013 | 1.58E-20       | 4.62E-17         | 36.13963 |
| EMP2        | -2.80704     | 12.36905       | -10.1903 | 2.22E-15       | 1.45E-12         | 24.65726 |
| TCF21       | -2.79398     | 7.099916       | -11.1203 | 5.12E-17       | 6.32E-14         | 28.3203  |
| LAMP3       | -2.76558     | 12.05272       | -7.11124 | 8.49E-10       | 6.92E-08         | 12.13018 |
| PLAC9       | -2.7242      | 7.955677       | -10.9874 | 8.73E-17       | 9.34E-14         | 27.8024  |

|          |          |          |          |          |          |          |
|----------|----------|----------|----------|----------|----------|----------|
| TPPP3    | -2.70132 | 9.710932 | -5.78585 | 1.95E-07 | 7.15E-06 | 6.84971  |
| SOSTDC1  | -2.67723 | 6.454697 | -7.07564 | 9.86E-10 | 7.86E-08 | 11.98555 |
| C13orf15 | -2.67539 | 11.40839 | -9.12861 | 1.80E-13 | 5.14E-11 | 20.37784 |
| HLF      | -2.66677 | 8.165715 | -6.61809 | 6.59E-09 | 4.04E-07 | 10.13715 |
| FABP4    | -2.65189 | 6.410904 | -11.0866 | 5.86E-17 | 6.96E-14 | 28.18919 |
| SDPR     | -2.64536 | 8.993928 | -8.86357 | 5.44E-13 | 1.27E-10 | 19.29776 |
| CDO1     | -2.63628 | 7.183343 | -9.46852 | 4.36E-14 | 1.63E-11 | 21.75711 |
| WISP2    | -2.62175 | 10.39802 | -6.43426 | 1.40E-08 | 7.70E-07 | 9.401333 |
| ADRB1    | -2.62134 | 8.288305 | -6.26603 | 2.80E-08 | 1.38E-06 | 8.732224 |
| SLC1A1   | -2.61163 | 8.777875 | -7.06013 | 1.05E-09 | 8.29E-08 | 11.92259 |
| SMAD6    | -2.58313 | 8.978113 | -9.53131 | 3.36E-14 | 1.31E-11 | 22.01104 |
| GPM6A    | -2.57284 | 6.375643 | -17.7094 | 2.54E-27 | 8.15E-23 | 51.06694 |
| KIAA0408 | -2.56803 | 7.472079 | -8.92201 | 4.26E-13 | 1.06E-10 | 19.5362  |
| ANXA3    | -2.56381 | 9.819399 | -7.75614 | 5.70E-11 | 6.87E-09 | 14.76309 |
| LPL      | -2.53862 | 9.809238 | -5.69038 | 2.85E-07 | 9.85E-06 | 6.481064 |
| AQP4     | -2.51776 | 8.945153 | -6.6101  | 6.81E-09 | 4.15E-07 | 10.1051  |
| COL6A6   | -2.50901 | 7.426245 | -6.9749  | 1.50E-09 | 1.13E-07 | 11.57684 |
| HIGD1B   | -2.50421 | 8.715539 | -7.84493 | 3.92E-11 | 5.07E-09 | 15.12682 |
| FAM150B  | -2.45985 | 6.972387 | -9.54918 | 3.12E-14 | 1.24E-11 | 22.08324 |
| EMCN     | -2.44193 | 8.931621 | -7.43292 | 2.21E-10 | 2.14E-08 | 13.44098 |
| NDRG4    | -2.43241 | 8.797698 | -8.15326 | 1.07E-11 | 1.69E-09 | 16.39064 |
| FLJ46446 | -2.42772 | 7.66975  | -7.76319 | 5.53E-11 | 6.74E-09 | 14.79199 |
| GPX3     | -2.40849 | 9.617297 | -6.54139 | 9.04E-09 | 5.26E-07 | 9.829621 |
| CLIC5    | -2.39573 | 10.07205 | -7.91113 | 2.97E-11 | 4.04E-09 | 15.39811 |
| FBLN5    | -2.38828 | 10.36003 | -7.7953  | 4.83E-11 | 5.98E-09 | 14.92349 |
| ARHGEF26 | -2.37306 | 8.088031 | -9.21076 | 1.27E-13 | 3.86E-11 | 20.71186 |
| CAMP     | -2.36179 | 7.088716 | -6.85472 | 2.47E-09 | 1.72E-07 | 11.09048 |
| ROBO4    | -2.33942 | 8.99776  | -8.75217 | 8.67E-13 | 1.89E-10 | 18.84284 |
| RAMP3    | -2.33174 | 7.34154  | -9.42879 | 5.14E-14 | 1.81E-11 | 21.59626 |
| MS4A7    | -2.29388 | 10.658   | -7.24186 | 4.92E-10 | 4.24E-08 | 12.66165 |
| ANGPT1   | -2.2899  | 8.331996 | -8.08597 | 1.42E-11 | 2.12E-09 | 16.11476 |
| CALCRL   | -2.27672 | 7.736635 | -9.5818  | 2.73E-14 | 1.16E-11 | 22.21502 |
| SSTR1    | -2.27103 | 7.010182 | -7.12858 | 7.90E-10 | 6.50E-08 | 12.20069 |
| SCN7A    | -2.26995 | 7.324706 | -8.85966 | 5.53E-13 | 1.28E-10 | 19.28179 |
| HEG1     | -2.2667  | 10.78066 | -8.45665 | 3.00E-12 | 5.64E-10 | 17.63382 |
| EPAS1    | -2.26343 | 13.84718 | -7.5337  | 1.45E-10 | 1.50E-08 | 13.85279 |
| MME      | -2.26028 | 7.445706 | -7.45879 | 1.98E-10 | 1.96E-08 | 13.54665 |
| CLDN5    | -2.255   | 10.97108 | -5.85337 | 1.49E-07 | 5.65E-06 | 7.111636 |
| PTPN21   | -2.25005 | 8.382917 | -9.96854 | 5.52E-15 | 3.00E-12 | 23.77082 |
| TBX2     | -2.24897 | 11.12536 | -7.1021  | 8.83E-10 | 7.15E-08 | 12.09306 |
| STXBP6   | -2.24889 | 7.517232 | -7.50572 | 1.63E-10 | 1.67E-08 | 13.7384  |
| FOXF1    | -2.24084 | 7.643346 | -10.495  | 6.39E-16 | 5.19E-13 | 25.86736 |
| SPARCL1  | -2.2395  | 11.66687 | -7.16908 | 6.67E-10 | 5.57E-08 | 12.3654  |
| RADIL    | -2.23148 | 7.865908 | -5.35376 | 1.07E-06 | 3.02E-05 | 5.199254 |



|          |          |          |          |          |          |          |
|----------|----------|----------|----------|----------|----------|----------|
| HSPA12B  | -2.22823 | 7.958093 | -9.40991 | 5.56E-14 | 1.90E-11 | 21.51983 |
| CHRDL1   | -2.2239  | 8.296611 | -7.29723 | 3.90E-10 | 3.49E-08 | 12.8873  |
| CAV2     | -2.21054 | 7.973899 | -8.14635 | 1.10E-11 | 1.73E-09 | 16.36231 |
| METTL7A  | -2.20995 | 11.73772 | -7.26409 | 4.49E-10 | 3.90E-08 | 12.75223 |
| FIBIN    | -2.20523 | 6.534673 | -9.56318 | 2.94E-14 | 1.20E-11 | 22.13983 |
| LYVE1    | -2.16628 | 7.032022 | -10.004  | 4.77E-15 | 2.78E-12 | 23.91293 |
| JAM2     | -2.16477 | 7.706179 | -8.94995 | 3.79E-13 | 9.80E-11 | 19.65015 |
| BTNL9    | -2.16057 | 6.924479 | -12.0282 | 1.41E-18 | 2.23E-15 | 31.80034 |
| COX7A1   | -2.15655 | 11.56955 | -8.25141 | 7.10E-12 | 1.18E-09 | 16.79292 |
| ACVRL1   | -2.15443 | 10.51495 | -7.40249 | 2.51E-10 | 2.35E-08 | 13.31672 |
| THBD     | -2.15159 | 11.43407 | -6.61695 | 6.62E-09 | 4.05E-07 | 10.13258 |
| CAV3     | -2.1331  | 6.517061 | -11.3989 | 1.69E-17 | 2.25E-14 | 29.39883 |
| NMUR1    | -2.13196 | 6.880116 | -10.8567 | 1.48E-16 | 1.53E-13 | 27.29144 |
| CLEC14A  | -2.13112 | 7.950611 | -8.17879 | 9.64E-12 | 1.52E-09 | 16.49527 |
| GPM6B    | -2.12317 | 7.24714  | -9.29962 | 8.80E-14 | 2.82E-11 | 21.07268 |
| RNF182   | -2.11516 | 6.528325 | -8.24481 | 7.30E-12 | 1.19E-09 | 16.76591 |
| LHFP     | -2.1079  | 11.25905 | -8.01901 | 1.89E-11 | 2.69E-09 | 15.84028 |
| CCRL1    | -2.10416 | 7.283198 | -8.53999 | 2.11E-12 | 4.18E-10 | 17.97503 |
| FABP5    | -2.09151 | 10.64035 | -6.38179 | 1.74E-08 | 9.19E-07 | 9.192198 |
| FAM189A2 | -2.08542 | 8.003897 | -7.54791 | 1.37E-10 | 1.43E-08 | 13.91091 |
| NDNF     | -2.06641 | 8.50587  | -5.7008  | 2.74E-07 | 9.53E-06 | 6.52123  |
| LMO2     | -2.06471 | 10.74688 | -6.84159 | 2.61E-09 | 1.81E-07 | 11.03739 |
| SRPX     | -2.04649 | 7.972472 | -6.35074 | 1.98E-08 | 1.02E-06 | 9.068613 |
| RSPO4    | -2.04349 | 7.008409 | -6.32377 | 2.21E-08 | 1.12E-06 | 8.961391 |
| ITM2A    | -2.04233 | 9.693858 | -6.91608 | 1.92E-09 | 1.38E-07 | 11.33864 |
| CYBRD1   | -2.03853 | 9.845482 | -6.85508 | 2.47E-09 | 1.72E-07 | 11.0919  |
| A2M      | -2.03499 | 14.49045 | -5.88357 | 1.32E-07 | 5.15E-06 | 7.229095 |
| GNG11    | -2.03368 | 11.43239 | -5.78635 | 1.94E-07 | 7.15E-06 | 6.851624 |
| LIMS2    | -2.01763 | 9.253783 | -9.40687 | 5.63E-14 | 1.90E-11 | 21.50751 |
| CCDC85A  | -2.01239 | 6.916163 | -8.90672 | 4.54E-13 | 1.11E-10 | 19.47384 |
| PTPRB    | -2.00856 | 7.921767 | -8.25679 | 6.94E-12 | 1.16E-09 | 16.81501 |
| HYAL1    | -2.00272 | 8.545659 | -5.64296 | 3.44E-07 | 1.16E-05 | 6.298781 |

---
